# Supplementary material
Source: PubMed Central journal article supplement (PMC5405738)
Supplement: NIHMS858640-supplement-8.pdf [file NIHMS858640-supplement-8.pdf]

**Table S1: Related to STAR Methods****Primer sequences for genotyping and qRT-PCR studies**

| <b>Target</b>                      | <b>Note</b> | <b>Sequence</b>          |
|------------------------------------|-------------|--------------------------|
| <i>Ccl2</i>                        | Forward     | TGGCTCAGCCAGATGCAGT      |
|                                    | Reverse     | TTGGGATCATCTTGCTGGTG     |
| <i>Cxcl10</i>                      | Forward     | GCCGTCATTTTCTGCCTCA      |
|                                    | Reverse     | CGTCCTTGCGAGAGGGATC      |
| <i>Ccr2</i>                        | Forward     | GTTACCTCAGTTCATCCA       |
|                                    | Reverse     | CAAGGCTCACCATCATCGTAGTC  |
| <i>Cxcr3</i>                       | Forward     | AGTTTTGGCCCGCAACTGT      |
|                                    | Reverse     | GGATTGAGGCAGCAGTGCAT     |
| <i>Il1b</i>                        | Forward     | ACCTGTCCTGTGTAATGAAAGACG |
|                                    | Reverse     | TGGGTATTGCTTGGGATCCA     |
| <i>Tnfa</i>                        | Forward     | GCACAGAAAGCATGATCCG      |
|                                    | Reverse     | GCCCCCATCTTTTGGG         |
| <i>Gapdh</i>                       | Forward     | GGCAAATTCAACGGCACAGT     |
|                                    | Reverse     | AGATGGTGATGGGCTTCCC      |
| WNV-E                              | Forward     | TCAGCGATCTCTCCACCAAAG    |
|                                    | Reverse     | GGGTCAGCCGTTTGTGATTG     |
| RIPK3-2xFV (intact transgene)      | Forward     | CCAGAGGCCACTTGTGTAGCG    |
|                                    | Reverse     | CGCTTTAGAAGCCTTCAGGTTGAC |
| RIPK3-2xFV (deleted stop cassette) | Forward     | AGCACTTGCTCTCCCAAAGTC    |
|                                    | Reverse     | TCACCTCCCAGGATATCTTCTTCG |
| Rosa26 locus                       | Forward     | AGCACTTGCTCTCCCAAAGTC    |
|                                    | Reverse     | CCGACAAAACCGAAAATCTGTGGG |
| Mox2-Cre                           | Common      | GGGACCACCTTCTTTTGGCTTC   |
|                                    | WT          | AAGATGTGGAGAGTTCCGGGGTAG |
|                                    | Mutant      | CCAGATCCTCCTCAGAAATCAGC  |
